# Supplementary material
Source: publisher figshare collection journal article supplement (https://frontiersin.figshare.com/ndownloader/files/31415263)
Supplement: Supplementary file 1 [file 31415263]

## Sheet: Final.SY09.xctBinomial_Table_20
Table S2. n = number of seedlings in the trial, SSf = number of trees with no stem symptoms at the end of the trial, SS = number of trees with stem symptoms at the end of the trial, p-values for exact binomial test for segregation ratios of alive:dead seedlings and 95% upper and lower confidence intervals. Families with stem symptoms are consistent with 1:1, 3:1, or 1:3 Alive:Dead ratios are indi…
Order	TreeID	n	SSf	SS	1:1	CI95_low.H1	CI95_high.H1	3:1	CI95_low.H2	CI95_high.H2	1:3	CI95_low.H3	CI95_high.H3
1	103	60	7	53	7.67192e-10	0.0482148	0.225716	6.63918e-25	0.0482148	0.225716	0.0162725	0.0482148	0.225716
2	104	42	2	40	4.11092e-10	0.00581982	0.161642	4.0718e-22	0.00581982	0.161642	0.00104581	0.00581982	0.161642
3	11	56	2	54	4.43257e-14	0.00435481	0.123132	2.70189e-30	0.00435481	0.123132	3.45489e-05	0.00435481	0.123132
4	15	59	6	53	1.75392e-10	0.0382445	0.20832	1.0262e-25	0.0382445	0.20832	0.00641254	0.0382445	0.20832
5	16	23	4	19	0.00259948	0.0495076	0.387812	1.09057e-08	0.0495076	0.387812	0.479516	0.0495076	0.387812
6	2	38	10	28	0.00509764	0.134034	0.431008	4.1655e-10	0.134034	0.431008	0.851934	0.134034	0.431008
7	27	39	14	25	0.108129	0.212037	0.528205	2.89566e-07	0.212037	0.528205	0.13737	0.212037	0.528205
8	50	43	5	38	2.49951e-07	0.0388523	0.250832	3.15684e-18	0.0388523	0.250832	0.050918	0.0388523	0.250832
9	51	54	5	49	3.89139e-10	0.0307528	0.203002	2.44913e-24	0.0307528	0.203002	0.00673977	0.0307528	0.203002
10	64	57	8	49	2.71685e-08	0.0625949	0.257945	5.51162e-22	0.0625949	0.257945	0.0652634	0.0625949	0.257945
11	72	58	0	58	6.93889e-18	0	0.061621	1.20371e-35	0	0.061621	1.1293e-07	0	0.061621
12	74	59	0	59	3.46945e-18	0	0.0606089	3.00927e-36	0	0.0606089	6.60372e-08	0	0.0606089
13	79	35	17	18	1	0.313829	0.660109	0.00123249	0.313829	0.660109	0.00272153	0.313829	0.660109
14	81	20	1	19	4.00543e-05	0.00126509	0.248733	5.54792e-11	0.00126509	0.248733	0.038177	0.00126509	0.248733
15	82	60	11	49	7.56128e-07	0.0952358	0.304396	4.92533e-20	0.0952358	0.304396	0.296175	0.0952358	0.304396
16	83	58	8	50	1.57026e-08	0.0614797	0.25381	1.59664e-22	0.0614797	0.25381	0.048946	0.0614797	0.25381
17	84	47	3	44	2.46473e-10	0.0133618	0.175392	2.26019e-23	0.0133618	0.175392	0.00196326	0.0133618	0.175392
18	CIF-401	21	0	21	9.53674e-07	0	0.161098	2.27374e-13	0	0.161098	0.00406549	0	0.161098
19	CIF-402	59	1	58	2.08167e-16	0.000429023	0.0908559	5.35649e-34	0.000429023	0.0908559	1.28244e-06	0.000429023	0.0908559
20	CIF-403	50	0	50	1.77636e-15	0	0.0711217	7.88861e-31	0	0.0711217	1.28612e-06	0	0.0711217
21	CIF-404	43	6	37	1.63612e-06	0.0529766	0.279325	6.05983e-17	0.0529766	0.279325	0.112534	0.0529766	0.279325
22	CIF-405	51	3	48	1.96749e-11	0.0122991	0.162422	1.13183e-25	0.0122991	0.162422	0.000578864	0.0122991	0.162422
23	CIF-406	51	1	50	4.61853e-14	0.000496304	0.104475	3.03711e-29	0.000496304	0.104475	1.25682e-05	0.000496304	0.104475
24	CIF-407	60	3	57	6.25385e-14	0.0104323	0.139243	7.07216e-31	0.0104323	0.139243	7.40556e-05	0.0104323	0.139243
25	CIF-409	60	2	58	3.17628e-15	0.00406262	0.115281	1.21206e-32	0.00406262	0.115281	1.53174e-05	0.00406262	0.115281
26	CIF-410	60	0	60	1.73472e-18	0	0.0596295	7.52316e-37	0	0.0596295	4.16182e-08	0	0.0596295
27	CIF-411	59	3	56	1.18933e-13	0.0106113	0.141487	2.68824e-30	0.0106113	0.141487	0.000114333	0.0106113	0.141487
28	SF-1	42	1	41	1.95541e-11	0.000602623	0.125659	6.56575e-24	0.000602623	0.125659	0.000120942	0.000602623	0.125659
29	SF-10	55	0	55	5.55112e-17	0	0.0648708	7.70372e-34	0	0.0648708	1.74281e-07	0	0.0648708
30	SF-2	25	0	25	5.96046e-08	0	0.137185	8.88178e-16	0	0.137185	0.00166837	0	0.137185
31	SF-3	50	0	50	1.77636e-15	0	0.0711217	7.88861e-31	0	0.0711217	1.28612e-06	0	0.0711217
32	SF-4	12	0	12	0.000488281	0	0.264648	5.96046e-08	0	0.264648	0.0459291	0	0.264648
33	SF-5	37	0	37	1.45519e-11	0	0.0948906	5.29396e-23	0	0.0948906	3.28595e-05	0	0.0948906
34	SF-6	43	0	43	2.27374e-13	0	0.0822111	1.29247e-26	0	0.0822111	8.17319e-06	0	0.0822111
35	SF-7	59	0	59	3.46945e-18	0	0.0606089	3.00927e-36	0	0.0606089	6.60372e-08	0	0.0606089
36	SF-8	40	0	40	1.81899e-12	0	0.0880973	8.27181e-25	0	0.0880973	2.23611e-05	0	0.0880973
37	SF-9	60	0	60	1.73472e-18	0	0.0596295	7.52316e-37	0	0.0596295	4.16182e-08	0	0.0596295
38	Susc_1	47	2	45	1.60441e-11	0.00519558	0.145405	4.98358e-25	0.00519558	0.145405	0.000292616	0.00519558	0.145405
39	Susc_2	48	3	45	1.31259e-10	0.0130792	0.17196	6.02423e-24	0.0130792	0.17196	0.0012858	0.0130792	0.17196
40	Susc_3	33	2	31	1.30851e-07	0.00742584	0.202264	6.57569e-17	0.00742584	0.202264	0.00831705	0.00742584	0.202264
